# Supplementary material
Source: PubMed Central journal article supplement (PMC3149269)
Supplement: mmc1.pdf [file mmc1.pdf]

# **Disaccharide binding to galectin-1: free energy calculations and the molecular recognition mechanism.**

*Supporting information for publication*

Ignacia Echeverria and L. Mario Amzel<sup>¶</sup>

Department of Biophysics and Biophysical Chemistry, Johns Hopkins University, School of Medicine, 725 N. Wolfe St., Baltimore, MD 21205, USA.

---

<sup>¶</sup> Corresponding author: L. Mario Amzel  
e-mail: mamzel@jhmi.edu

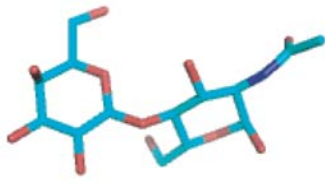

Gal(β1-4)GlcNAc

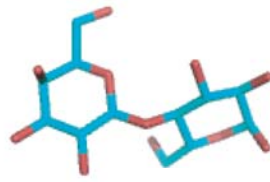

Gal(β1-4)Glc

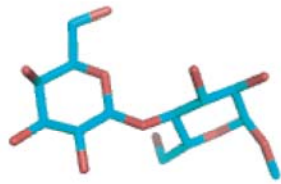

Gal(β1-4)Glcβ-OMe

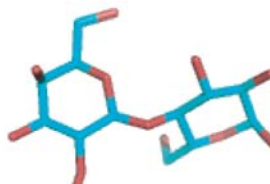

MeO-2Gal(β1-4)Glc

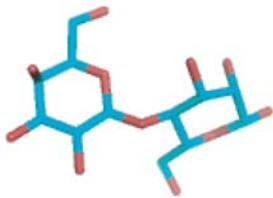

Gal(β1-4)Man

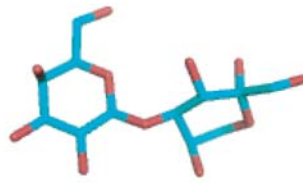

Gal(β1-4)Frp

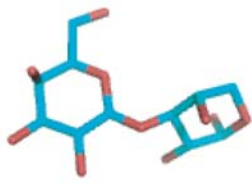

Gal(β1-3)Arp

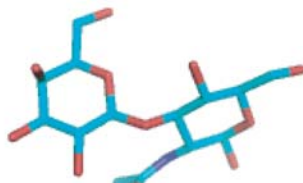

Gal(β1-3)GlcNAc

**Supplemental figure S.1: Disaccharides used for the simulations.** Line-representation of the 8 disaccharides used in the simulations.

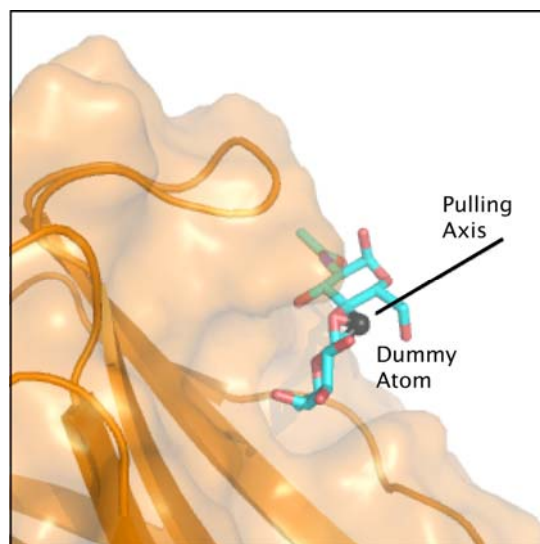

**Supplemental figure S.2: Dummy atom locations and pulling axis.** The figure shows the binding site for the disaccharide. The dummy atom, which is located in the center of mass of the sugar, is shown as a grey sphere. The pulling axis (second moment of inertia) is also highlighted in grey. The right hand side of the line is the final position of the dummy atom (8 Å from the initial position).

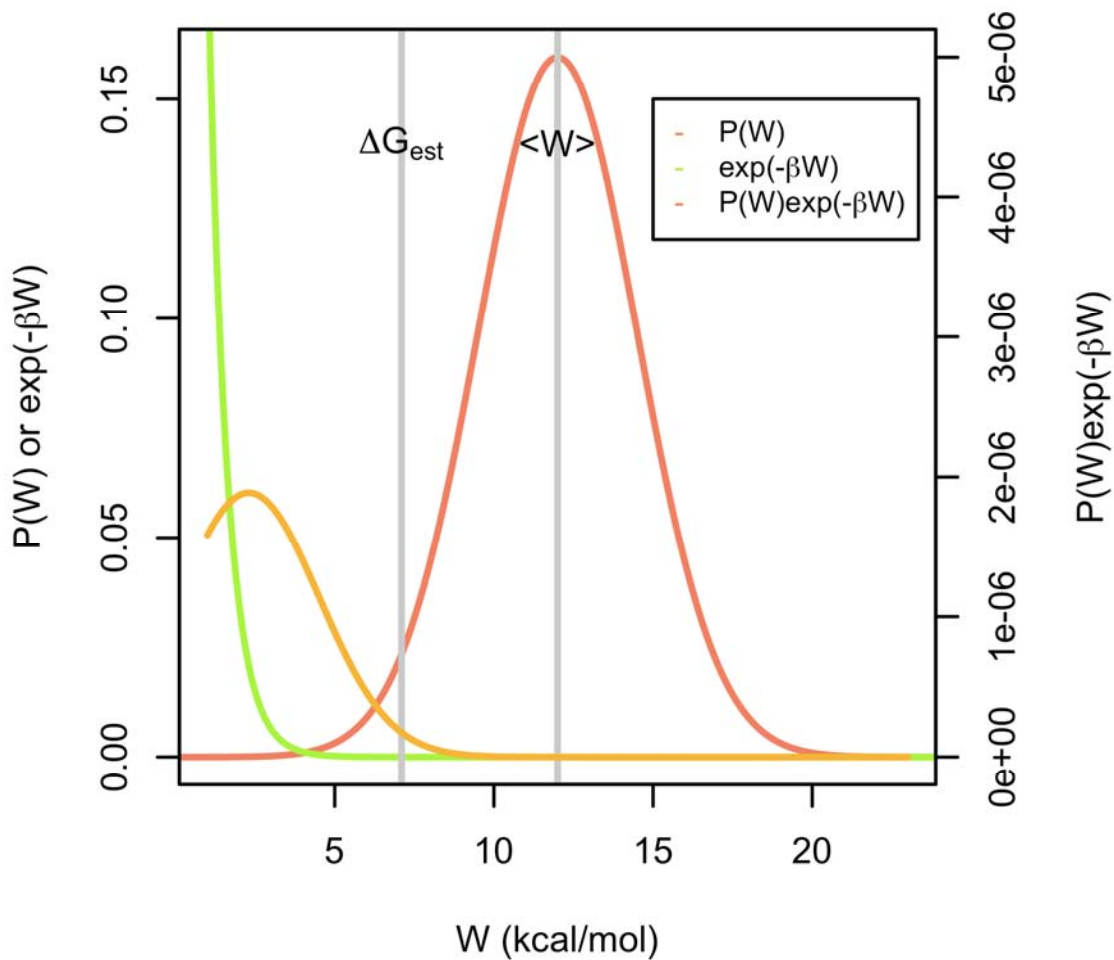

**Supplemental figure S.3: Jarzynski average of the exponential work values.** Both the work probability distribution and exponential work values are shown. Jarzynski's equality heavily weights the low tail of the work distribution. Vertical lines represent the average work and the estimated free energy ( $\Delta G_{\text{est}}$ ).

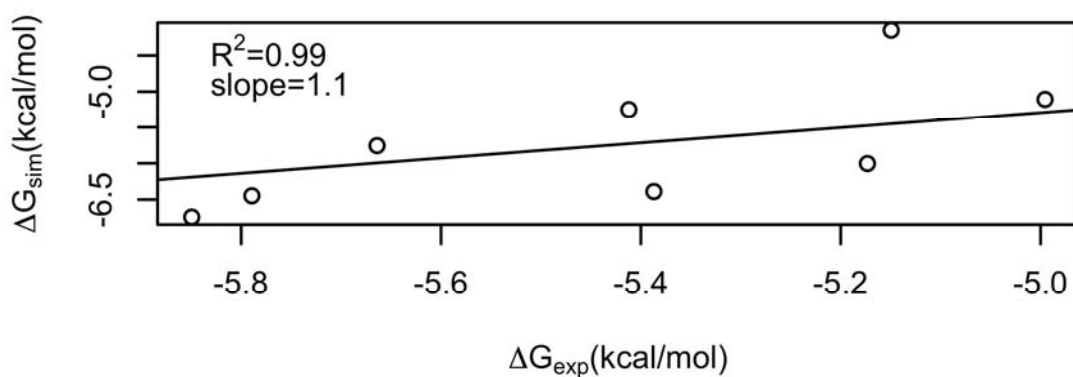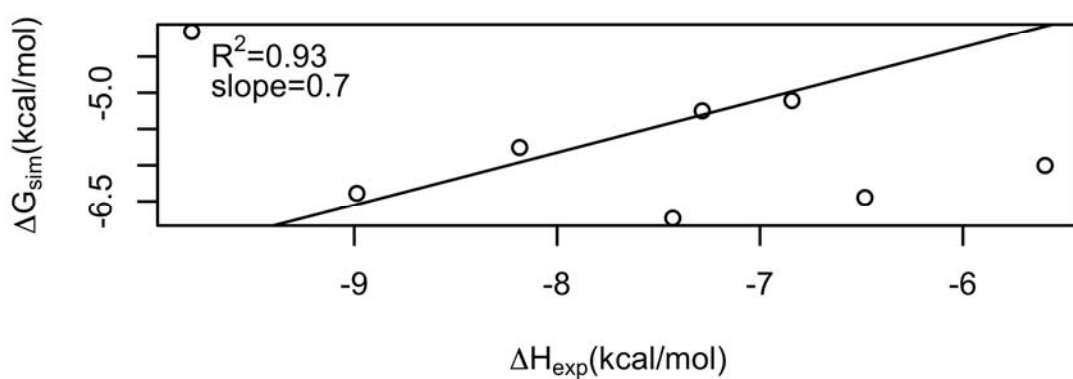

**Supplemental figure S.4: Correlation between experimental and simulations free energy and enthalpy values.** Top: Correlation between experimental  $\Delta G_{\text{exp}}$  and simulations estimated  $\Delta G_{\text{sim}}$  for all disaccharides. The slope and  $R^2$  of the linear fit is presented. Bottom: Correlation between experimental  $\Delta H_{\text{exp}}$  and simulations estimated  $\Delta G_{\text{sim}}$  for all disaccharides. The slope and  $R^2$  of the linear fit is presented. A better correlation is obtained for free energy values, showing how simulations capture a combination of enthalpy and entropy change.

**Supplemental table S.1:** Hydrogen bonds between galectin-1 and ligand with occupancies > 15%. Shaded in grey are hydrogen bonds formed with the galactose unit.

| Acceptor   | Donor       | Gal $\beta$ 1,4Glc<br>NAc | MeO-<br>2Gal $\beta$ 1,4Glc | Gal $\beta$ 1,3Glc<br>NAc | Gal $\beta$ 1,4Man | Gal $\beta$ 1,4Fru | Gal $\beta$ 1,4Glc | Gal $\beta$ 1,3Arp | Gal $\beta$ 1,4Glc<br>$\beta$ -OMe |
|------------|-------------|---------------------------|-----------------------------|---------------------------|--------------------|--------------------|--------------------|--------------------|------------------------------------|
| Gal-O4     | 44-Hsp-HE2  | 70.4                      | 70.0                        | 69.3                      | 73.1               | 83.4               | 71.0               | 85.4               | 75.5                               |
| Gal-O4     | 48-Arg-HH21 | 84.9                      | 83.8                        | 85.8                      | 81.2               | 83.3               | 82.4               | 56.1               | 89.3                               |
| Gal-O5     | 48-Arg-HH22 | 99.3                      | 99.4                        | 93.3                      | 99.6               | 99.8               | 99.4               | 96.0               | 99.7                               |
| Gal-O6     | 61-Asn-HD22 | 97.2                      | 95.3                        | 90.8                      | 99.2               | 98.9               | 98.9               | 64.1               | 98.6                               |
| 71-Glu-OE2 | Gal-HO6     | 64.1                      | 64.0                        | 59.6                      | 73.4               | 58.1               | 67.1               | 21.7               | 70.7                               |
| Glc-O2     | 73-Arg-HH22 | -                         | 72.9                        | -                         | -                  | -                  | 74.8               | -                  | 74.0                               |
| Glc-O3     | 48-Arg-H11  | 100.0                     | 100.0                       | 58.8                      | -                  | -                  | 64.3               | -                  | 100.0                              |
| Glc-O3     | 48-Arg-H22  | 59.1                      | 70.3                        | -                         | -                  | -                  | 100.0              | -                  | 67.9                               |
| 71-Glu-OE2 | Glu-O3      | 74.9                      | 74.5                        | -                         | -                  | -                  | 78.8               | -                  | 77.9                               |
| Glc-O3     | 73-Arg-H22  | 47.5                      | 84.8                        | -                         | -                  | -                  | 83.0               | -                  | 84.0                               |
| Glc-O4     | 48-Arg-H11  | -                         | -                           | 99.6                      | -                  | -                  | -                  | -                  | -                                  |
| Glc-O4     | 48-Arg-H22  | 59.2                      | 55.7                        | 63.4                      | -                  | -                  | 52.5               | -                  | 45.4                               |
| 71-Glu-OE2 | Glc-O4      | -                         | -                           | 85.6                      | -                  | -                  | -                  | -                  | -                                  |
| Glc-O4     | 73-Arg-HH21 | -                         | -                           | 53.5                      | -                  | -                  | -                  | -                  | -                                  |
| 71-Glu-OE1 | Man-O2      | -                         | -                           | -                         | 88.7               | -                  | -                  | -                  | -                                  |
| Man-O3     | 48-Arg-H11  | -                         | -                           | -                         | 100.0              | -                  | -                  | -                  | -                                  |
| Man-O3     | 48-Arg-H22  | -                         | -                           | -                         | 50.3               | -                  | -                  | -                  | -                                  |
| 71-Glu-OE1 | Man-O3      | -                         | -                           | -                         | 57.4               | -                  | -                  | -                  | -                                  |
| Man-O3     | 73-Arg-H22  | -                         | -                           | -                         | 88.7               | -                  | -                  | -                  | -                                  |
| Man-O4     | 48-Arg-H22  | -                         | -                           | -                         | 47.1               | -                  | -                  | -                  | -                                  |
| 71-Glu-OE1 | Frp-O2      | -                         | -                           | -                         | -                  | 32.7               | -                  | -                  | -                                  |
| Frp-O3     | 48-Arg-H11  | -                         | -                           | -                         | -                  | 99.8               | -                  | -                  | -                                  |
| Frp-O3     | 48-Arg-H22  | -                         | -                           | -                         | -                  | 33.3               | -                  | -                  | -                                  |
| 71-Glu-OE2 | Frp-O3      | -                         | -                           | -                         | -                  | 81.7               | -                  | -                  | -                                  |
| Frp-O3     | 73-Arg-HH22 | -                         | -                           | -                         | -                  | 86.9               | -                  | -                  | -                                  |
| Frp-O4     | 48-Arg-HH22 | -                         | -                           | -                         | -                  | 71.3               | -                  | -                  | -                                  |
| Arp-O3     | 48-Arg-H22  | -                         | -                           | -                         | -                  | -                  | -                  | 85.6               | -                                  |
| Arp-O4     | 48-Arg-H22  | -                         | -                           | -                         | -                  | -                  | -                  | 33.6               | -                                  |
| Arp-O4     | 48-Arg-H11  | -                         | -                           | -                         | -                  | -                  | -                  | 96.3               | -                                  |
| Arp-O4     | 73-Arg-H22  | -                         | -                           | -                         | -                  | -                  | -                  | 18.1               | -                                  |
